# Supplementary material for: Evaluation and optimization of the influence of silver cluster ions on the MALDI-TOF-MS analysis of polystyrene nanoplastic polymers
Source: Royal Society of Chemistry journal article supplement (doi:10.1039/d1ay02219a), 2022-01-01
Supplement: d1ay02219a1.pdf [file d1ay02219a1.pdf]

522 **Journal: Analytical Methods**

523 *Supplementary material of the article:*

524 **Evaluation and optimization of influence of silver cluster ions into MALDI-TOF-MS**

525 **analysis of polystyrene nanoplastic polymer**

526

527 Théogène Habumugisha<sup>a,b</sup>, Zixing Zhang<sup>a</sup>, Jean Claude Ndayishimiye<sup>a,b</sup>, François

528 Nkinahamira<sup>a,b</sup>, Alexis Kayiranga<sup>ab</sup>, Eric Cyubahiro<sup>a,b</sup>, Rehman Abdul<sup>a,b</sup>, Changzhou Yan<sup>a</sup>,

529 Xian Zhang<sup>a,\*</sup>

530

531 <sup>a</sup>*Key Lab of Urban Environment and Health, Institute of Urban Environment, Chinese*

532 *Academy of Sciences, Xiamen 361021, China*

533 <sup>b</sup>*University of Chinese Academy of Sciences, Beijing 100049, China*

534

535

536 **\*Corresponding authors:**

537 Zhang Xian, Institute of Urban Environment, Chinese Academy of Sciences, Xiamen, 361021,

538 China, E-mail: [xzhang@iue.ac.cn](mailto:xzhang@iue.ac.cn)

539

540 This supplementary information contains:

541 4 Pages

542 1 Table

543 1 Figure

544 7 References

545 **Supplementary Table S1.** List of chemical reagents.

| CAS No     | Chemical name                                 | Chemical formula                                  | Molecular characteristic      |                               | Manufacturer's name                           | Supplier           |
|------------|-----------------------------------------------|---------------------------------------------------|-------------------------------|-------------------------------|-----------------------------------------------|--------------------|
|            |                                               |                                                   | Weight (g mol <sup>-1</sup> ) | Density (g cm <sup>-3</sup> ) |                                               |                    |
| 1143-38-0  | Dithranol                                     | C <sub>14</sub> H <sub>10</sub> O <sub>3</sub>    | 226.23                        | 1.40                          | Dithranol                                     | Sigma-Aldrich, USA |
| 490-79-9   | 2,5-Dihydroxybenzoic acid (DHB), Sinapic acid | C <sub>7</sub> H <sub>6</sub> O <sub>4</sub>      | 154.12                        | 1.37                          | 2,5-Dihydroxybenzoic acid (DHB), Sinapic acid | Sigma-Aldrich, USA |
| 7761-88-8  | Silver nitrate                                | AgNO <sub>3</sub>                                 | 169.87                        | 4.35                          | Silver nitrate                                | Sigma-Aldrich, USA |
| 1634-82-8  | 2-(4-hydroxyphenylazo) benzoic acid           | C <sub>13</sub> H <sub>10</sub> O <sub>3</sub>    | 214.22                        | 1.30                          | 2-(4-hydroxyphenylazo) benzoic acid           | Sigma-Aldrich, USA |
| 29953-71-7 | Trans-3-Indoleacrylic acid (IAA),             | C <sub>11</sub> H <sub>9</sub> NO <sub>2</sub>    | 187.19                        | 1.4                           | trans-3-Indoleacrylic acid (IAA),             | Sigma-Aldrich, USA |
| 120-12-7   | Anthracene                                    | C <sub>14</sub> H <sub>10</sub>                   | 178.22                        | 1.1                           | Anthracene                                    | Sigma-Aldrich, USA |
| 83-32-9    | Acenaphthene                                  | C <sub>12</sub> H <sub>10</sub>                   | 154.20                        | 1.06                          | Acenaphthene                                  | Sigma-Aldrich, USA |
| 129-00-0   | Pyrene                                        | C <sub>16</sub> H <sub>10</sub>                   | 203.25                        | 1.27                          | Pyrene                                        | Sigma-Aldrich, USA |
| 2966-50-9  | Silver trifluoroacetate                       | CF <sub>3</sub> COOAg                             | 220.88                        | N/A                           | Silver trifluoroacetate                       | Sigma-Aldrich, USA |
| 10125-13-0 | Copper (II) chloride                          | CuCl <sub>2</sub>                                 | 134.45                        | 3.39                          | copper (II) Chloride                          | Sigma-Aldrich, USA |
| 109-99-9   | Tetrahydrofuran                               | (CH <sub>2</sub> ) <sub>3</sub> CH <sub>2</sub> O | 72.11                         | 0.89                          | Tetrahydrofuran                               | Sigma-Aldrich, USA |
| 75-05-8    | Acetonitrile                                  | CH <sub>3</sub> CN                                | 41.05                         | 0.79                          | Acetonitrile                                  | Sigma-Aldrich, USA |

546

547

548



562 The 3x3 grid for sample ratio determination was done using a 3x3 grid of samples, the relative  
563 concentrations of cationization agent-analyte-matrix were systematically varied to empirically  
564 determine an optimized sample preparation. This was typically done by holding one of the three  
565 variables constant (20  $\mu$ L of matrix solution) while increasing the amount of the other two  
566 (cationization agent (y-axis) and analyte (x-axis) components) by a set multiple (2-fold in the  
567 example depicted).

568

569

## 570 **Reference**

- 571 1 W.-F. Su, in *Principles of polymer design and synthesis*, Springer, 2013, pp. 9–26.
- 572 2 M. Wagner, C. Pietsch, L. Tauhardt, A. Schallon and U. S. Schubert, *J. Chromatogr. A*,  
573 2014, **1325**, 195–203.
- 574 3 R. F. Brady, *Comprehensive desk reference of polymer characterization and analysis*,  
575 American Chemical Society Washington, DC, 2003.
- 576 4 J. W. A. van den Berg and J. Schuijjer, in *Macromolecular Biomaterials*, CRC Press, 2018,  
577 pp. 19–56.
- 578 5 G. Capaccio and I. M. Ward, *Polymer (Guildf.)*, 2015, **15**, 233–238.
- 579 6 N. Ghahramani and M. Rahmati, *Int. J. Heat Mass Transf.*, 2020, **154**, 119487.
- 580 7 Y. Guillaneuf and P. Castignolles, *J. Polym. Sci. Part A Polym. Chem.*, 2008, **46**, 897–911.
